# Supplementary material
Source: PubMed Central journal article supplement (PMC8085770)
Supplement: NIHMS1690560-supplement-1.pdf [file NIHMS1690560-supplement-1.pdf]

## Supplementary Information

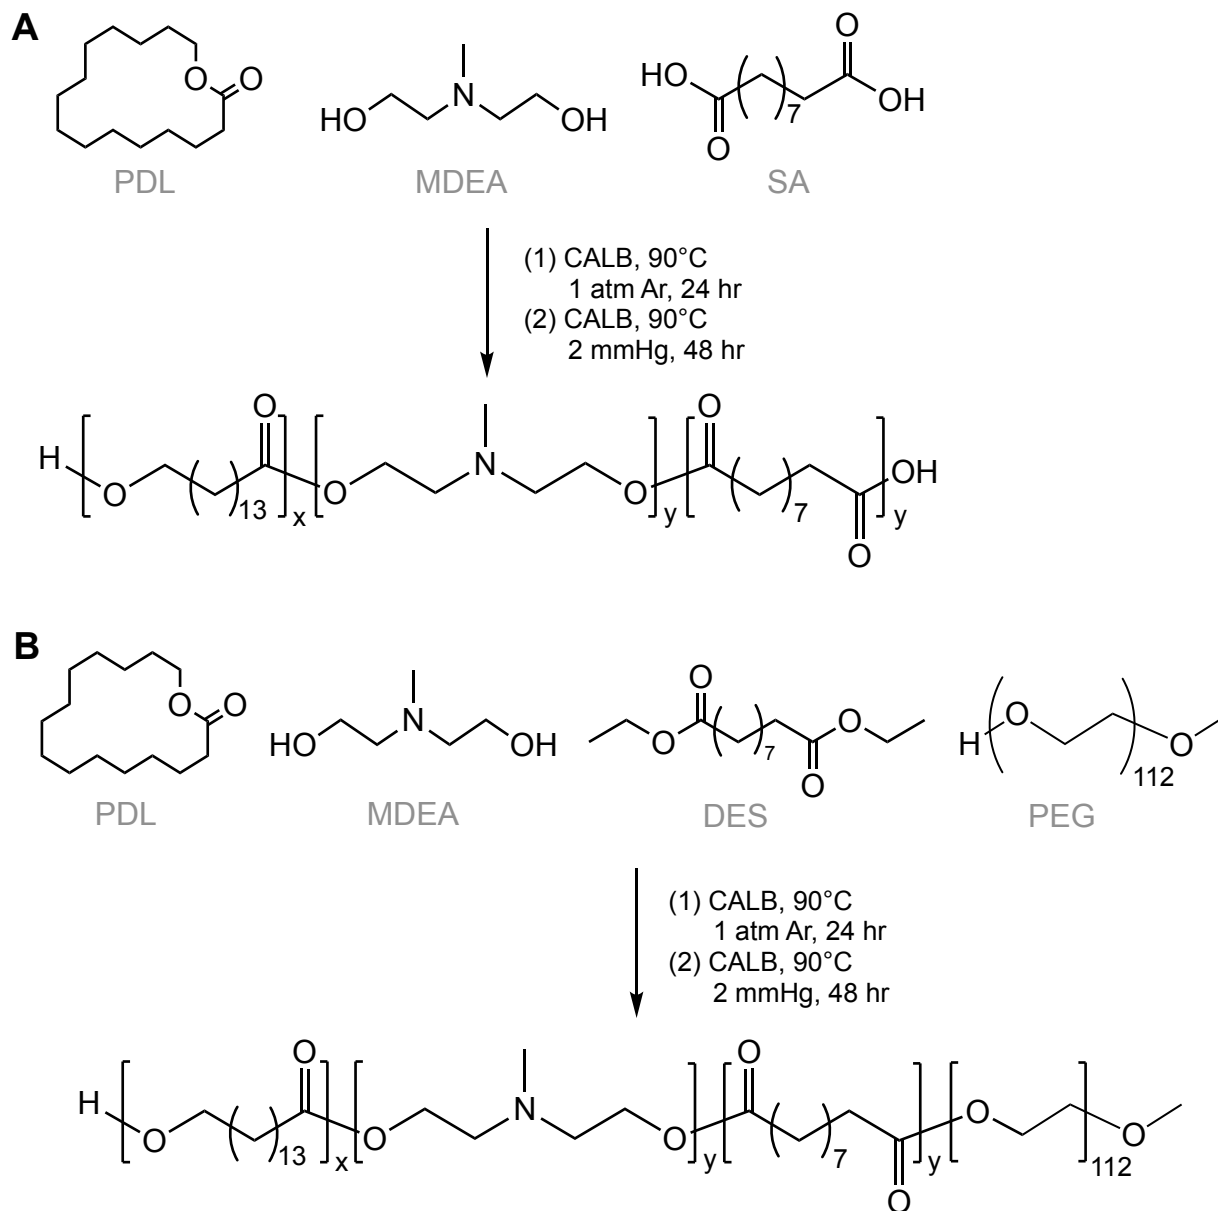

**Figure S1:** The synthetic routes for **(A)** PACE and **(B)** PACE-PEG. Polymers were synthesized by enzymatic copolymerization.

| <b>PACE-PEG content (wt%)</b> | <b>PEG content (wt%)</b> |
|-------------------------------|--------------------------|
| 0                             | 0                        |
| 0.01                          | 0.0046                   |
| 0.025                         | 0.011                    |
| 0.05                          | 0.023                    |
| 0.1                           | 0.046                    |
| 0.25                          | 0.11                     |
| 0.5                           | 0.23                     |
| 1                             | 0.46                     |
| 2.5                           | 1.1                      |
| 5                             | 2.3                      |
| 10                            | 4.6                      |
| 50                            | 23                       |

**Table S1:** Calculation of theoretical PEG weight percentage corresponding to PACE-PEG content in blended polyplexes.

| <b>Polymer</b> | <b>M<sub>n</sub> (Da)</b> | <b>M<sub>w</sub> (Da)</b> | <b>PDI</b> |
|----------------|---------------------------|---------------------------|------------|
| PACE           | 9000                      | 17500                     | 1.93       |
| PACE-PEG       | 8200                      | 15000                     | 1.84       |

**Table S2:** Molecular Weight and PDI of PACE and PACE-PEG by GPC.

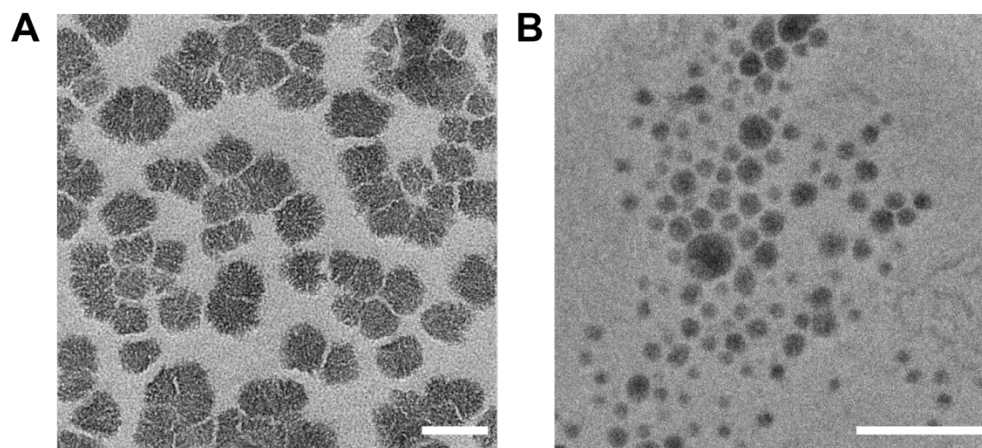

**Figure S2:** TEM images of (A) non-PEGylated PACE polyplexes and (B) polyplexes made with 100% PACE-PEG (scale bar, 200 nm).

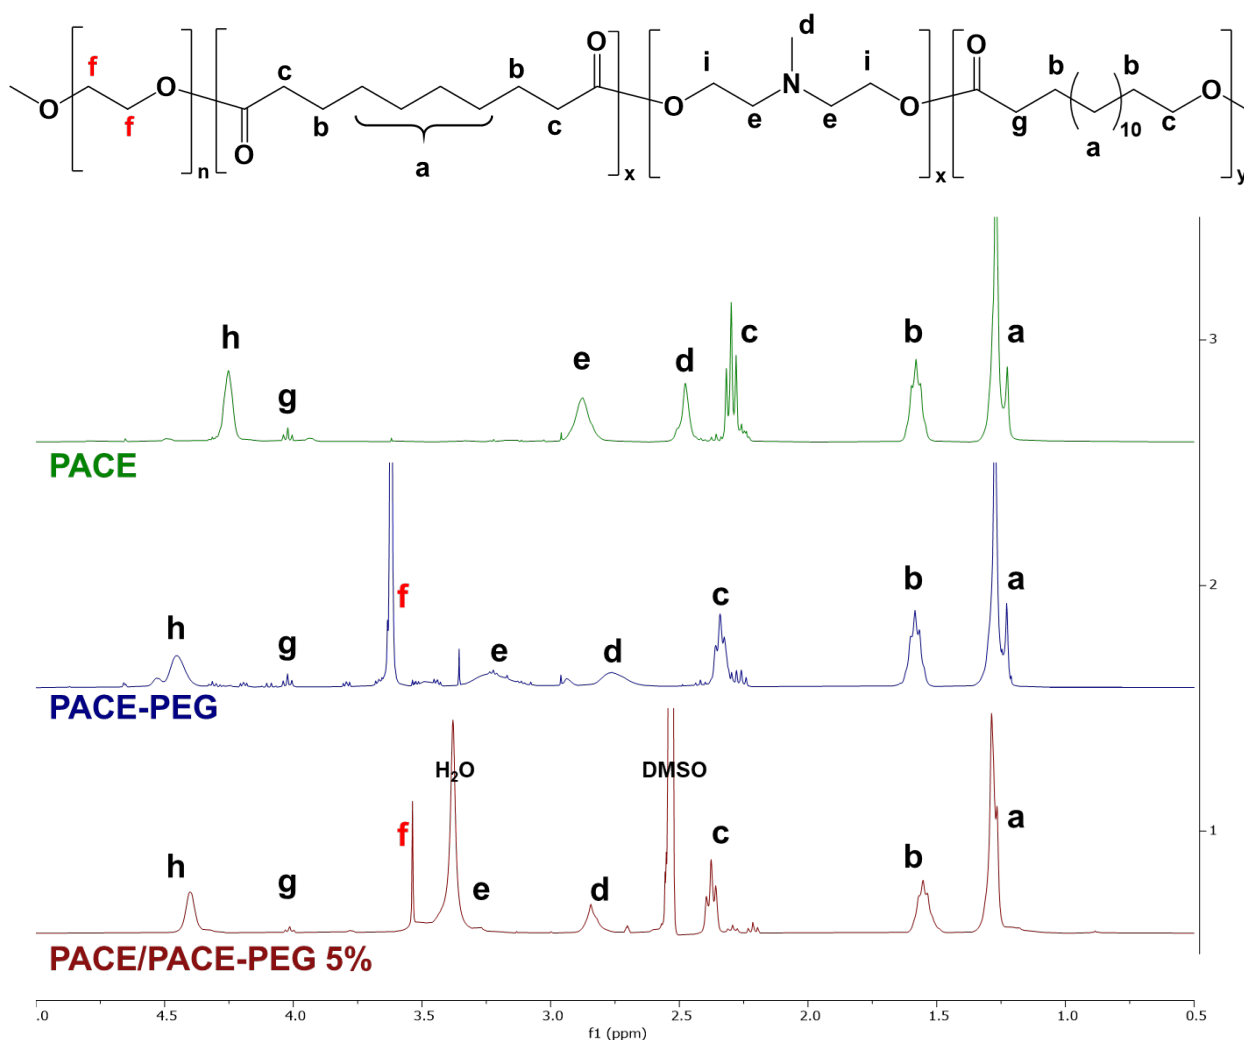

**Figure S3:** Confirmation of PACE-PEG integration into polyplexes. mRNA-loaded polyplexes with 5% PACE-PEG by weight were formulated and washed twice in a filter centrifuge tube (100 kDa MWCO, Amicon Ultra, Millipore Sigma) to remove excess polymer and salts. Washed polyplexes were lyophilized and analyzed by NMR and compared to PACE and PACE-PEG polymer.

|          | molar ratio PDL:MDEA:SBA(DES) |      |          | wt% of monomer |      |          |      | wt% PACE to PEG |      |
|----------|-------------------------------|------|----------|----------------|------|----------|------|-----------------|------|
|          | PDL                           | MDEA | SBA(DES) | PDL            | MDEA | SBA(DES) | PEG  | PACE            | PEG  |
| PACE     | 7.6                           | 45.8 | 46.7     | 12.1           | 30.8 | 57.1     |      | 100.0           |      |
| PACE-PEG | 10.8                          | 44.1 | 45.1     | 9.1            | 15.7 | 29.3     | 45.8 | 54.2            | 45.8 |
| PP5%     | 10.1                          | 41.5 | 48.4     | 15.1           | 26.0 | 55.2     | 3.7  | 96.3            | 3.7  |

**Table S3:** NMR analysis of mRNA-loaded polyplexes with 5% PACE-PEG by weight (PP5%) compared to PACE and PACE-PEG.

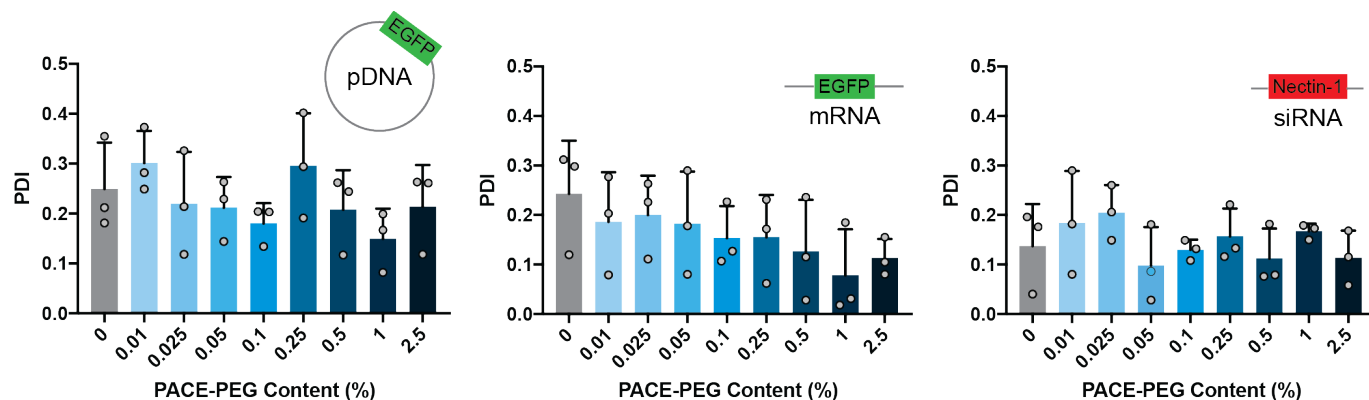

**Figure S4:** PDI of PACE polyplexes blended with PACE-PEG.

| PACE-PEG content (wt%) | N:P (pDNA polyplexes) | Zeta Potential (mV, pDNA polyplexes) | N:P (mRNA polyplexes) | Zeta Potential (mV, mRNA polyplexes) | N:P (siRNA polyplexes) | Zeta Potential (mV, siRNA polyplexes) |
|------------------------|-----------------------|--------------------------------------|-----------------------|--------------------------------------|------------------------|---------------------------------------|
| 0                      | 94:1                  | -7.1 ± 5.2                           | 98:1                  | -11 ± 3.1                            | 96:1                   | -12.5 ± 4.3                           |
| 0.01                   | 94:1                  | -5.9 ± 1.1                           | 98:1                  | -9.6 ± 3.7                           | 96:1                   | -12.4 ± 3.4                           |
| 0.025                  | 94:1                  | -5.3 ± 2.4                           | 98:1                  | -9.4 ± 2.2                           | 96:1                   | -13.3 ± 2.5                           |
| 0.05                   | 94:1                  | -7.7 ± 5.1                           | 98:1                  | -12.9 ± 3.6                          | 96:1                   | -14.3 ± 3                             |
| 0.1                    | 94:1                  | -7.6 ± 3.8                           | 98:1                  | -12.6 ± 3.2                          | 96:1                   | -14 ± 4.3                             |
| 0.25                   | 94:1                  | -8 ± 2.8                             | 98:1                  | -11.3 ± 3.3                          | 96:1                   | -14.6 ± 3.2                           |
| 0.5                    | 94:1                  | -7.5 ± 5.7                           | 97:1                  | -12.3 ± 5.1                          | 96:1                   | -16.3 ± 6.4                           |
| 1                      | 94:1                  | -6.8 ± 6.4                           | 97:1                  | -13.9 ± 2.8                          | 96:1                   | -15.9 ± 2.9                           |
| 2.5                    | 93:1                  | -10.3 ± 6.4                          | 96:1                  | -13.2 ± 4.5                          | 95:1                   | -18.1 ± 4                             |

**Table S4:** Comparison of PACE polyplex zeta potential and corresponding N:P ratios for a range of PACE-PEG concentrations.

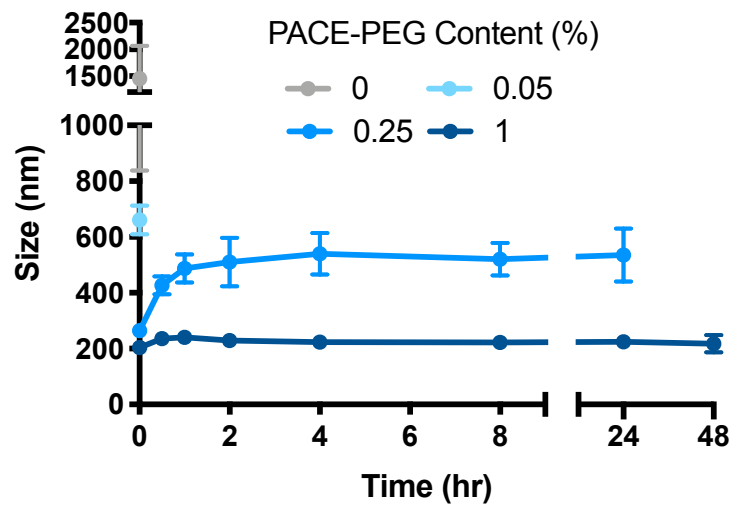

**Figure S5:** Stability of mRNA-loaded PACE polyplexes in sodium acetate buffer (25 mM, pH 6) with 10% FBS at 37°C while shaking.
